# Supplementary material for: Optical property trends in a family of {Mo6I8} aquahydroxo complexes
Source: Royal Society of Chemistry journal article supplement (doi:10.1039/d1dt01293b), 2021-01-01
Supplement: d1dt01293b1.pdf [file d1dt01293b1.pdf]

## Supporting Information

### Optical properties regularities in the family of $\{\text{Mo}_6\text{I}_8\}$ aquahydroxo complexes

Margarita V. Marchuk,<sup>a</sup> Natalya A. Vorotnikova,<sup>a</sup> Yuri A. Vorotnikov,<sup>\*a</sup> Natalia V. Kuratieva,<sup>a</sup> Dmitri V. Stass,<sup>b,c</sup> Michael A. Shestopalov<sup>a</sup>

<sup>a</sup>*Nikolaev Institute of Inorganic Chemistry SB RAS, 3 Acad. Lavrentiev Ave., 630090 Novosibirsk, Russia*

<sup>b</sup>*Voevodsky Institute of Chemical Kinetics and Combustion SB RAS, 3 Institutskaya st., 630090 Novosibirsk, Russia*

<sup>c</sup>*Novosibirsk State University, 2 Pirogova Str., 630090 Novosibirsk, Russian Federation*

\*Corresponding Author:

\*Yuri A. Vorotnikov

Tel. +7-383-330-92-53, Fax +7-383-330-94-89

e-mail: vorotnikov@niic.nsc.ru

## Content

|                                                                                                                                                                                  |    |
|----------------------------------------------------------------------------------------------------------------------------------------------------------------------------------|----|
| FTIR spectra, XRPD patterns, and TGA curves .....                                                                                                                                | S3 |
| Crystallographic data and selected interatomic distances .....                                                                                                                   | S4 |
| Representation of the layered structure in <b>1-NO<sub>3</sub></b> and <b>1-OTs</b> and absorption spectra of aqueous solutions of <b>1-NO<sub>3</sub></b> at different pH ..... | S5 |
| Selected parameters of crystal structure and emission of the clusters and deconvolution of the emission spectra of <b>1-NO<sub>3</sub></b> and <b>1-OTs</b> in solid state.....  | S6 |
| Deconvolution of the emission spectra of <b>2-h2</b> and <b>2-h12<sup>new</sup></b> in solid state.....                                                                          | S7 |
| Parameters of deconvolution of emission spectra in solid state and deconvolution of the emission spectra of <b>1-NO<sub>3</sub></b> in aqueous solution at pH = 3.2 and 2.1..... | S8 |
| Deconvolution of the emission spectra of <b>1-NO<sub>3</sub></b> in aqueous solution at pH = 1.2 and 0.0 .....                                                                   | S9 |
| Parameters of deconvolution of emission spectra of <b>1-NO<sub>3</sub></b> in in aqueous solution at different pH.....                                                           | 10 |

FTIR spectra, XRPD patterns, and TGA curves

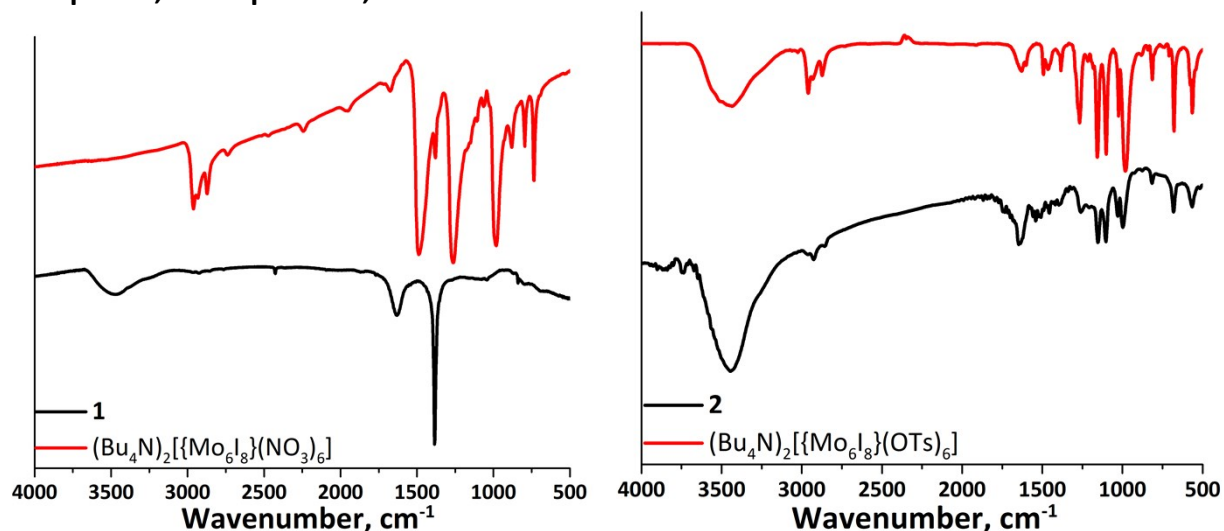

Figure 1S. FTIR spectra of 1-NO<sub>3</sub> (left) and 1-OTs (right) in comparison with initial clusters.

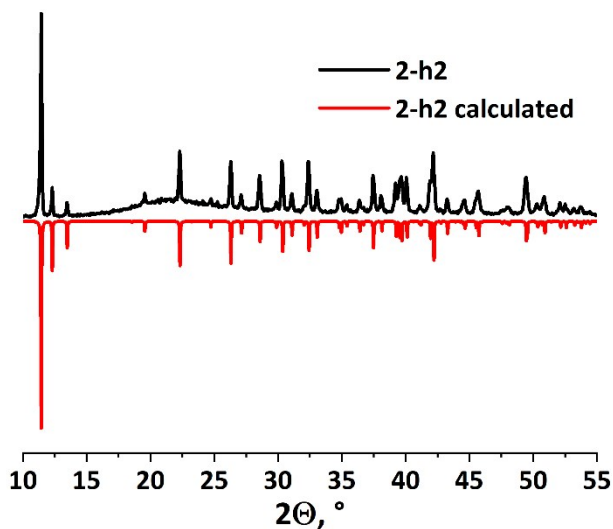

Figure 2S. XRPD pattern of 2-h2 in comparison with calculated from the crystal structures of  $[\{\text{Mo}_6\text{I}_8\}(\text{H}_2\text{O})_2(\text{OH})_4]\cdot 2\text{H}_2\text{O}$ .

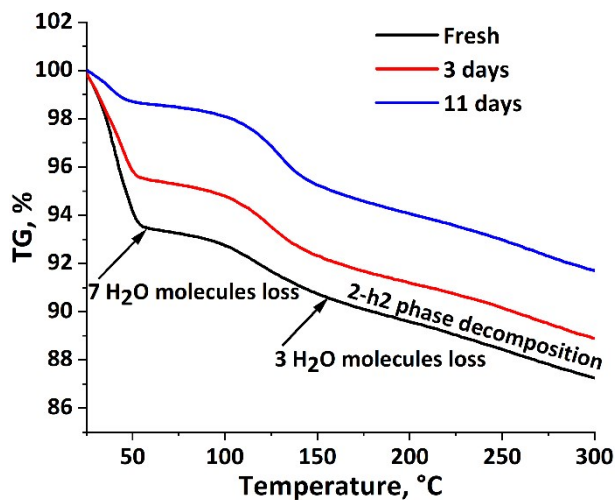

Figure 3S. TGA curves of 2-h2 and 2-h12<sup>new</sup> (fresh and 3 and 11 days old). Heating rates of 10 °C min<sup>-1</sup>.

**Table 1S.** Crystallographic data, data collection and refinement parameters.

|                                                            | <b>1-NO<sub>3</sub></b>                                                       | <b>1-OTs</b>                                                                                  | <b>2-h12<sup>new</sup></b>                                     |
|------------------------------------------------------------|-------------------------------------------------------------------------------|-----------------------------------------------------------------------------------------------|----------------------------------------------------------------|
| Empirical formula                                          | H <sub>16</sub> I <sub>8</sub> Mo <sub>6</sub> N <sub>2</sub> O <sub>15</sub> | C <sub>14</sub> H <sub>28</sub> I <sub>8</sub> Mo <sub>6</sub> O <sub>14</sub> S <sub>2</sub> | H <sub>32</sub> I <sub>8</sub> Mo <sub>6</sub> O <sub>18</sub> |
| Formula weight                                             | 1874.99                                                                       | 2075.32                                                                                       | 1911.09                                                        |
| Temperature (K)                                            | 150(2)                                                                        | 150(2)                                                                                        | 150(2)                                                         |
| Crystal size (mm <sup>3</sup> )                            | 0.120 × 0.100 × 0.030                                                         | 0.160 × 0.130 × 0.040                                                                         | 0.085 × 0.085 × 0.035                                          |
| Crystal system                                             | Triclinic                                                                     | Triclinic                                                                                     | Triclinic                                                      |
| Space group                                                | P-1                                                                           | P-1                                                                                           | P-1                                                            |
| Z                                                          | 2                                                                             | 1                                                                                             | 1                                                              |
| Unit cell dimensions                                       |                                                                               |                                                                                               |                                                                |
| a (Å)                                                      | 10.5553(3)                                                                    | 9.447(1)                                                                                      | 9.4284(9)                                                      |
| b (Å)                                                      | 11.5145(3)                                                                    | 9.459(1)                                                                                      | 9.799(1)                                                       |
| c (Å)                                                      | 12.9195(3)                                                                    | 11.504(1)                                                                                     | 10.008(1)                                                      |
| α (°)                                                      | 78.837(1)                                                                     | 77.300(3)                                                                                     | 73.929(4)                                                      |
| β (°)                                                      | 78.265(1)                                                                     | 79.348(3)                                                                                     | 67.566(4)                                                      |
| γ (°)                                                      | 67.511(1)                                                                     | 73.852(3)                                                                                     | 88.598(4)                                                      |
| Volume (Å <sup>3</sup> )                                   | 1408.80(6)                                                                    | 954.8(2)                                                                                      | 817.8(1)                                                       |
| D <sub>calcd.</sub> (g·cm <sup>-3</sup> )                  | 4.420                                                                         | 3.609                                                                                         | 3.815                                                          |
| μ (mm <sup>-1</sup> )                                      | 11.411                                                                        | 8.539                                                                                         | 9.837                                                          |
| θ range (°)                                                | 1.623 – 27.619                                                                | 1.831 – 27.157                                                                                | 2.300 – 36.312                                                 |
| Index ranges                                               | -12 ≤ h ≤ 13<br>-11 ≤ k ≤ 14<br>-13 ≤ l ≤ 16                                  | -12 ≤ h ≤ 12<br>-12 ≤ k ≤ 12<br>-14 ≤ l ≤ 14                                                  | -15 ≤ h ≤ 12<br>-16 ≤ k ≤ 14<br>-16 ≤ l ≤ 13                   |
| Reflections collected                                      | 12016                                                                         | 7699                                                                                          | 22858                                                          |
| Independent reflections                                    | 6450 (R <sub>int</sub> = 0.0293)                                              | 4143 (R <sub>int</sub> = 0.0337)                                                              | 7293 (R <sub>int</sub> = 0.0411)                               |
| Data / restraints / parameters                             | 6450 / 19 / 342                                                               | 4143 / 6 / 210                                                                                | 7293 / 0 / 159                                                 |
| R[F <sup>2</sup> > 2σ(F <sup>2</sup> )]                    | R <sub>1</sub> = 0.0185<br>wR <sub>2</sub> = 0.0466                           | R <sub>1</sub> = 0.0634<br>wR <sub>2</sub> = 0.1967                                           | R <sub>1</sub> = 0.0357<br>wR <sub>2</sub> = 0.0645            |
| R(F <sup>2</sup> ) (all data)                              | R <sub>1</sub> = 0.0342<br>wR <sub>2</sub> = 0.0492                           | R <sub>1</sub> = 0.0680<br>wR <sub>2</sub> = 0.2010                                           | R <sub>1</sub> = 0.0504<br>wR <sub>2</sub> = 0.0692            |
| Goodness-of-fit on F <sup>2</sup>                          | 1.037                                                                         | 1.063                                                                                         | 1.018                                                          |
| Δρ <sub>max</sub> , Δρ <sub>min</sub> (e·Å <sup>-3</sup> ) | 1.135, -0.866                                                                 | 2.813, -7.017                                                                                 | 1.462, -2.278                                                  |

**Table 2S.** Selected interatomic distances (Å).

|       | <b>1-NO<sub>3</sub></b> | <b>1-OTs</b>      | <b>2-h12<sup>new</sup></b> |
|-------|-------------------------|-------------------|----------------------------|
| Mo-Mo | 2.6509(4)–2.6751(4)     | 2.647(1)–2.662(1) | 2.6566(5)–2.6670(5)        |
| Mo-I  | 2.7599(4)–2.8049(4)     | 2.781(1)–2.801(1) | 2.787(5)–2.8057(5)         |
| Mo-O  | 2.113(2)–2.189(3)       | 2.053(7)–2.175(8) | 2.089(3)–2.192(3)          |

Representation of the layered structure in 1-NO<sub>3</sub> and 1-OTs and absorption spectra of aqueous solutions of 1-NO<sub>3</sub> at different pH

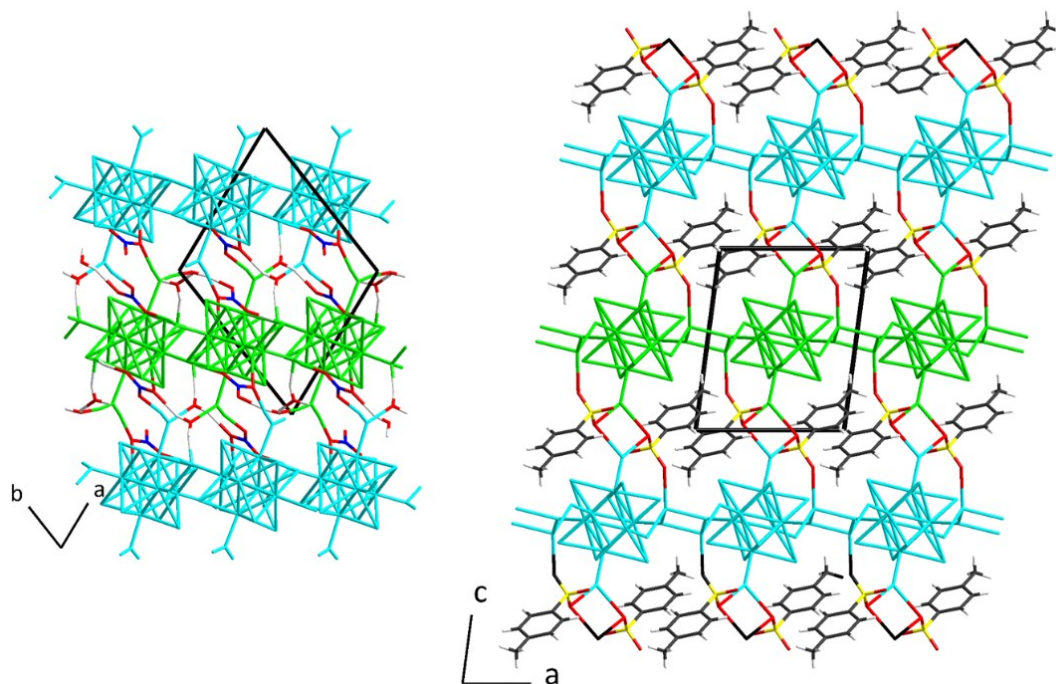

Figure 4S. The side view on the layers in 1-NO<sub>3</sub> (left) and 1-OTs (right).

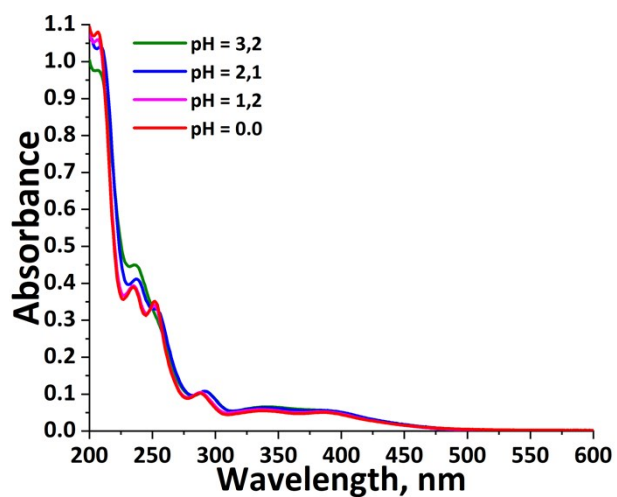

Figure 5S. Absorption spectra of aqueous solutions of 1-NO<sub>3</sub> at different pH (3.1, 2.1, 1.2 and 0).

## Selected parameters of crystal structure and emission of the clusters and deconvolution of the emission spectra of 1-NO<sub>3</sub> and 1-OTs in solid state

**Table 3S.** Selected parameters of crystal structure and emission of the clusters.

| Cluster              | Number of direct hydrogen contacts | $d_{\text{calc}}$ , g cm <sup>-3</sup> | Cluster-cluster contacts, Å | $\lambda_{\text{em}}$ , nm | Relative intensity, a.u. | $S_{\text{int}}$ , a.u. <sup>#</sup> |
|----------------------|------------------------------------|----------------------------------------|-----------------------------|----------------------------|--------------------------|--------------------------------------|
| 1-OTs                | 0                                  | 3.609                                  | 9.447; 9.459; 11.504        | 661                        | 395                      | 50239                                |
| 2-h12 <sup>new</sup> | 0                                  | 3.815                                  | 9.428; 9.799; 10.008        | 693                        | 274                      | 7887                                 |
| 1-NO <sub>3</sub>    | 4                                  | 4.420                                  | 8.885; 8.945; 10.555        | 705                        | 66                       | 29261                                |
| 2-h2                 | 6                                  | 4.932                                  | 9.138; 9.634                | 706                        | 18                       | 1889                                 |

<sup>#</sup> $S_{\text{int}}$  is integrated emission intensity (area under the curve)

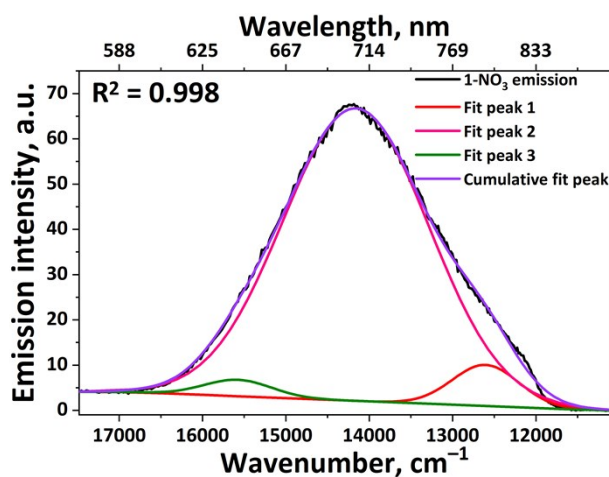

**Figure 6S.** Deconvolution of the emission spectra of 1-NO<sub>3</sub> in solid state.

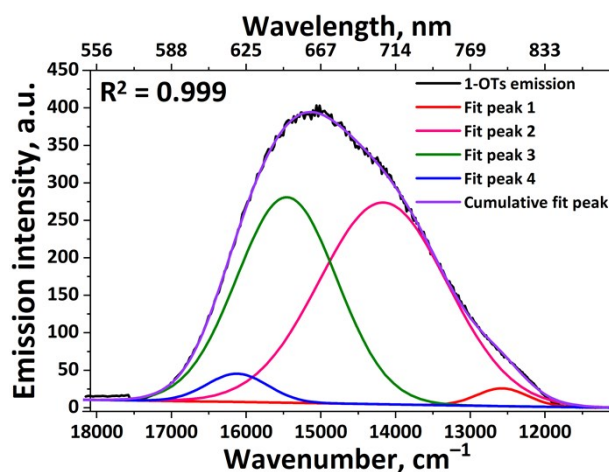

**Figure 7S.** Deconvolution of the emission spectra of 1-OTs in solid state.

## Deconvolution of the emission spectra of 2-h2 and 2-h12<sup>new</sup> in solid state

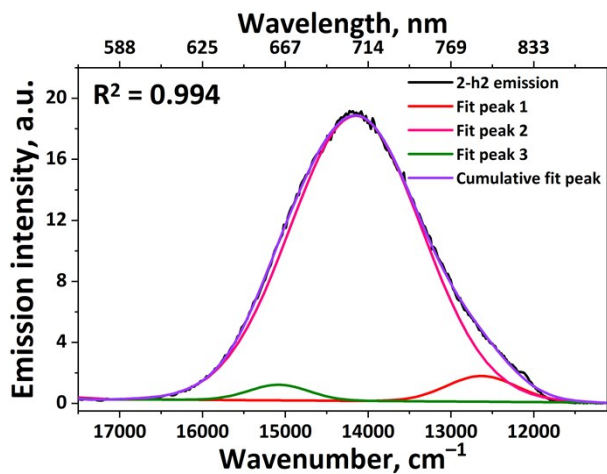

Figure 8S. Deconvolution of the emission spectra of 2-h2 in solid state.

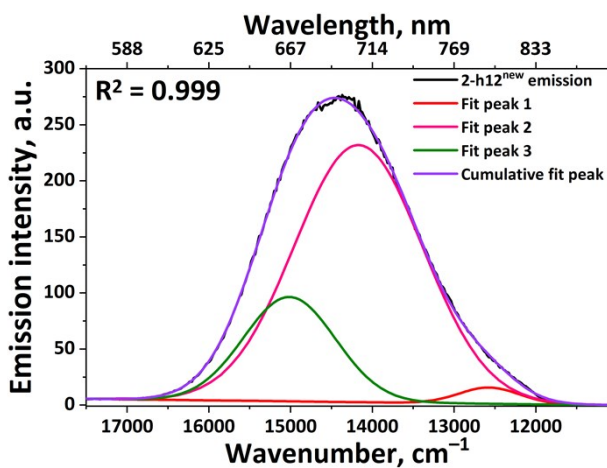

Figure 9S. Deconvolution of the emission spectra of 2-h12<sup>new</sup> in solid state.

**Parameters of deconvolution of emission spectra in solid state and deconvolution of the emission spectra of 1-NO<sub>3</sub> in aqueous solution at pH = 3.2 and 2.1**

**Table 4S.** Overall emission maximum ( $\lambda_{em}$ ), integrated emission intensity ( $S_{int}$ ), peak positions, FWHM, relative contributions of the peaks integrated area to the area of cumulative peak in %, and coefficient of determination of cumulative peak ( $R^2$ ) for clusters in solid state.

| Parameter                                     | 1-OTs           | 1-NO <sub>3</sub> | 2-h12 <sup>new</sup> | 2-h2            |
|-----------------------------------------------|-----------------|-------------------|----------------------|-----------------|
| $\lambda_{em}$ , nm;<br>(cm <sup>-1</sup> )   | 661;<br>(15135) | 705;<br>(14180)   | 693;<br>(14416)      | 706,<br>(14164) |
| $\lambda_{max1}$ , nm;<br>(cm <sup>-1</sup> ) | 620;<br>(16118) | –                 | –                    | –               |
| $\lambda_{max2}$ , nm;<br>(cm <sup>-1</sup> ) | 647;<br>(15455) | 642<br>(15578)    | 666;<br>(15013)      | 663;<br>(15077) |
| $\lambda_{max3}$ , nm;<br>(cm <sup>-1</sup> ) | 706;<br>(14165) | 706;<br>(14159)   | 706;<br>(14168)      | 707;<br>(14147) |
| $\lambda_{max4}$ , nm;<br>(cm <sup>-1</sup> ) | 795;<br>(12571) | 793;<br>(12605)   | 796;<br>(12571)      | 792<br>(12629)  |
| FWHM 1                                        | 958             | –                 | –                    | –               |
| FWHM 2                                        | 1575            | 948               | 1321                 | 851             |
| FWHM 3                                        | 2016            | 2062              | 1848                 | 1868            |
| FWHM 4                                        | 795             | 936               | 865                  | 998             |
| Cont. 1, %                                    | 3.51            | –                 | –                    | –               |
| Cont. 2, %                                    | 41.96           | 2.37              | 21.98                | 2.32            |
| Cont. 3, %                                    | 52.70           | 91.79             | 75.78                | 93.19           |
| Cont. 4, %                                    | 1.83            | 5.84              | 2.24                 | 4.49            |
| $R^2$                                         | 0.999           | 0.998             | 0.999                | 0.994           |

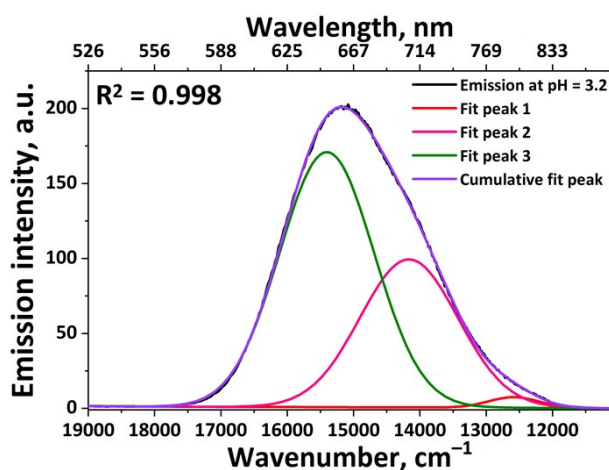

**Figure 10S.** Deconvolution of the emission spectra of 1-NO<sub>3</sub> in aqueous solution at pH = 3.2.

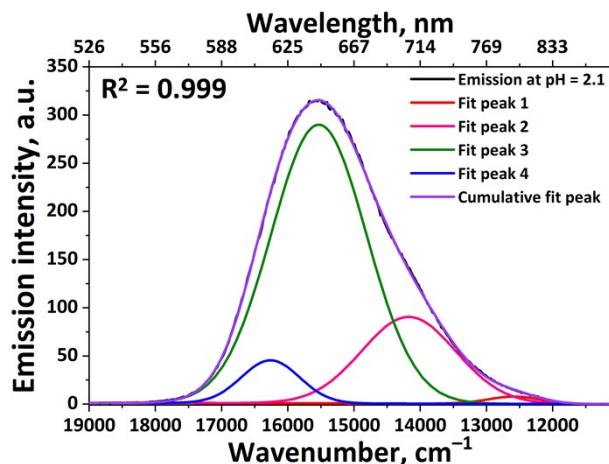

**Figure 11S.** Deconvolution of the emission spectra of 1-NO<sub>3</sub> in aqueous solution at pH = 2.1.



Deconvolution of the emission spectra of 1-NO<sub>3</sub> in aqueous solution at pH = 1.2 and 0.0

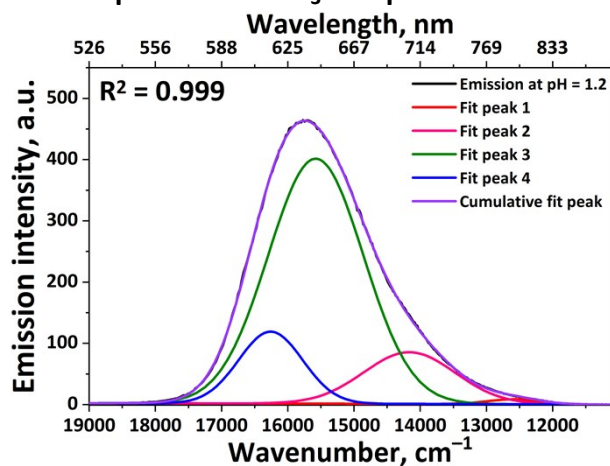

Figure 12S. Deconvolution of the emission spectra of 1-NO<sub>3</sub> in aqueous solution at pH = 1.2.

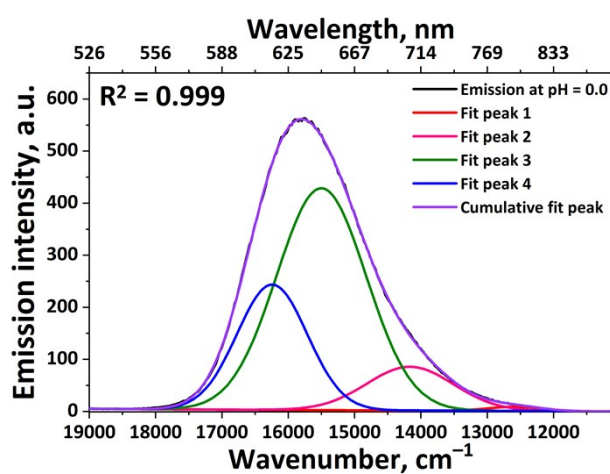

Figure 13S. Deconvolution of the emission spectra of 1-NO<sub>3</sub> in aqueous solution at pH = 0.0.

## Parameters of deconvolution of emission spectra of 1-NO<sub>3</sub> in aqueous solution at different pH

**Table 5S.** Overall emission maximum ( $\lambda_{em}$ ), integrated emission intensity ( $S_{int}$ ), peak positions, FWHM, relative contributions of the peaks integrated area to the area of cumulative peak in %, and coefficient of determination of cumulative peak ( $R^2$ ) for **1-NO<sub>3</sub>** in aqueous solution at different pH.

| Parameter                               | pH = 3.2        | pH = 2.1        | pH = 1.2        | pH = 0.0        |
|-----------------------------------------|-----------------|-----------------|-----------------|-----------------|
| $\lambda_{em}$ , nm;<br>( $cm^{-1}$ )   | 658;<br>(15198) | 643;<br>(15552) | 636;<br>(15723) | 633,<br>(15798) |
| $S_{int}$ , a.u.#                       | 22324           | 31797           | 42967           | 49345           |
| $\lambda_{max1}$ , nm;<br>( $cm^{-1}$ ) | -               | 615;<br>(16261) | 615;<br>(16258) | 616;<br>(16242) |
| $\lambda_{max2}$ , nm;<br>( $cm^{-1}$ ) | 649;<br>(15402) | 644;<br>(15532) | 642;<br>(15577) | 645;<br>(15500) |
| $\lambda_{max3}$ , nm;<br>( $cm^{-1}$ ) | 706;<br>(14166) | 706;<br>(14173) | 706;<br>(14167) | 706;<br>(14164) |
| $\lambda_{max4}$ , nm;<br>( $cm^{-1}$ ) | 795;<br>(12583) | 795;<br>(12577) | 795;<br>(12579) | 795;<br>(12575) |
| FWHM 1                                  | -               | 1031            | 1137            | 1245            |
| FWHM 2                                  | 1676            | 1696            | 1690            | 1588            |
| FWHM 3                                  | 1738            | 1673            | 1628            | 1541            |
| FWHM 4                                  | 884             | 935             | 934             | 947             |
| Cont. 1, %                              | -               | 6.61            | 13.99           | 26.91           |
| Cont. 2, %                              | 61.60           | 70.70           | 70.83           | 60.80           |
| Cont. 3, %                              | 37.06           | 21.67           | 14.40           | 11.61           |
| Cont. 4, %                              | 1.34            | 1.01            | 0.78            | 0.68            |
| $R^2$                                   | 0.998           | 0.999           | 0.999           | 0.999           |

# $S_{int}$  is integrated emission intensity (area under the curve)
